# Supplementary material for: Egg consumption and the risk of cardiovascular disease and all-cause mortality: Guangzhou Biobank Cohort Study and meta-analyses
Source: Springer Nature journal article supplement (doi:10.1007/s00394-018-1692-3), 2018-04-21
Supplement: MOESM1 [file 15711616]

Title: Egg consumption and the risk of cardiovascular disease and all-cause mortality: Guangzhou Biobank Cohort Study and meta-analyses

Journal name: European Journal of Nutrition

Authors’ names and affiliations: Lin Xu, *PhD* 1,2, Tai Hing Lam, *MD* 2,3*, Chao Qiang Jiang, *MD* 3*, Wei Sen Zhang, *PhD* 3, Feng Zhu, *PhD* 3, Ya Li Jin, *MPhil* 3, Jean Woo, *MD* 5, Kar Keung Cheng, *PhD* 4, G Neil Thomas, *PhD*4

1 School of Public Health, Sun yat-sen University, Guangzhou, China

2 School of Public Health, the University of Hong Kong, Hong Kong

3 Guangzhou No.12 Hospital, Guangzhou 510620, China

4 Institute of Applied Health Research, University of Birmingham, Birmingham, UK

5 Department of Medicine and Therapeutics, the Chinese University of Hong Kong, Hong Kong

# joint corresponding author

Corresponding author: Professor Tai Hing Lam

School of Public Health, The University of Hong Kong

Hong Kong, China

**Tel:** (852) 3917 9287; **Fax:** (852) 2855 9528

**Email:**[hrmrlth@hku.hk](mailto:hrmrlth@hkucc.hku.hk)

***OR***

Corresponding author: Professor CQ Jiang

Guangzhou Number12 Hospital, Guangzhou 510620, China

Tel: (86) 3898 1268; Fax: (86) 38981257

Email: cqjiang[@hku.hk](mailto:hrmrlth@hkucc.hku.hk)

ESM Table 1. ICD-10 codes for deaths from cardiovascular disease

| **Causes of deaths** | **ICD-10** |
| --- | --- |
| Cardiovascular disease | I00-I25, I28-I99 |
| Ischemic heart disease | I20-I25 |
| Stroke | I60-I69 |
| Ischemic stroke | I63 |
| Hemorrhagic stroke | I61 |
| Ischemic heart disease or ischemic stroke | I20-I25, I63 |

ESM Table 2 Cross-sectional analysis of the association of egg consumption with cardiovascular risk factors in 28,024 participants based on baseline information collected from September 2003 to January 2008; regression coefficient β, (95% confidence interval).

|  | Egg consumption, numberper week | | | | |  |
| --- | --- | --- | --- | --- | --- | --- |
|  | <1 | 1-2 | 3-4 | 5-6 | 7+ | P for trend |
| **Systolic blood pressure, mmHg** |  |  |  |  |  |  |
| Crude | Reference (0) | 2.34 (1.66, 3.02)** | -0.47 (-1.14, 0.2) | -1.73 (-2.96, -0.51)** | -1.62 (-2.59, -0.65)*** | <0.001 |
| Model 1 | Reference (0) | -1.07 (-1.69, -0.44)* | -1.45 (-2.17, -0.73)* | -2.44 (-3.62, -1.26)** | -2.56 (-3.54, -1.59)*** | <0.001 |
| Model 2† | Reference (0) | -0.94 (-1.7, -0.17)* | -1.57 (-2.45, -0.69)* | -2.62 (-3.99, -1.24)** | -3.05 (-4.3, -1.79)*** | <0.001 |
| Model 3† | Reference (0) | -0.86 (-1.63, -0.1)* | -1.58 (-2.46, -0.7)* | -2.52 (-3.9, -1.15)** | -3.01 (-4.27, -1.75)*** | <0.001 |
| **Diastolic blood pressure, mmHg** |  |  |  |  |  |  |
| Crude | Reference (0) | -0.64 (-0.99, -0.29)* | -0.79 (-1.19, -0.39)* | -1.42 (-2.09, -0.76)* | -1.67 (-2.22, -1.13)*** | <0.001 |
| Model 1 | Reference (0) | -0.55 (-0.88, -0.22)* | -0.46 (-0.85, -0.08)* | -0.94 (-1.57, -0.32)* | -1.06 (-1.58, -0.55)* | <0.001 |
| Model 2† | Reference (0) | -0.51 (-0.91, -0.11)* | -0.51 (-0.98, -0.05)* | -0.99 (-1.72, -0.27)* | -1.3 (-1.97, -0.64)** | <0.001 |
| Model 3† | Reference (0) | -0.46 (-0.87, -0.06)* | -0.52 (-0.99, -0.06)* | -0.95 (-1.68, -0.23)* | -1.3 (-1.97, -0.64)** | <0.001 |
| **LDL-cholesterol, mmol/l** |  |  |  |  |  |  |
| Crude | Reference (0) | 0.01 (-0.01, 0.03) | -0.03 (-0.06, -0.01)* | -0.07 (-0.12, -0.03)* | -0.07 (-0.1, -0.03)* | <0.001 |
| Model 1 | Reference (0) | 0.001 (-0.02, 0.02) | -0.04 (-0.06, -0.01)* | -0.06 (-0.1, -0.02)* | -0.07 (-0.1, -0.03)* | <0.001 |
| Model 2† | Reference (0) | 0.01 (-0.01, 0.04) | -0.03 (-0.06, 0.004) | -0.03 (-0.08, 0.01) | -0.07 (-0.11, -0.03)* | <0.001 |
| Model 3† | Reference (0) | 0.01 (-0.02, 0.03) | -0.03 (-0.06, 0.003) | -0.03 (-0.08, 0.01) | -0.06 (-0.11, -0.02)* | <0.001 |
| **HDL-cholesterol, mmol/l** |  |  |  |  |  |  |
| Crude | Reference (0) | -0.0005 (-0.01, 0.01) | 0.0002 (-0.01, 0.01) | -0.03 (-0.05, -0.002)* | -0.004 (-0.02, 0.02) | 0.42 |
| Model 1 | Reference (0) | 0.001 (-0.01, 0.01) | -0.004 (-0.02, 0.01) | -0.03 (-0.05, -0.01)* | -0.01 (-0.03, 0.01) | 0.38 |
| Model 2† | Reference (0) | -0.002 (-0.02, 0.01) | -0.01 (-0.03, 0.009) | -0.04 (-0.07, -0.01)* | -0.003 (-0.03, 0.02) | 0.38 |
| Model 3† | Reference (0) | -0.01 (-0.02, 0.01) | -0.01 (-0.03, 0.006) | -0.04 (-0.07, -0.02)** | -0.01 (-0.03, 0.02) | 0.32 |
| **Triglycerides, mmol/l** |  |  |  |  |  |  |
| Crude | Reference (0) | -0.06 (-0.1, -0.02)* | -0.11 (-0.15, -0.06)** | -0.11 (-0.19, -0.04)** | -0.15 (-0.21, -0.09)** | <0.001 |
| Model 1 | Reference (0) | -0.06 (-0.1, -0.02)* | -0.09 (-0.13, -0.05)** | -0.06 (-0.13, 0.01) | -0.12 (-0.18, -0.06)** | <0.001 |
| Model 2† | Reference (0) | -0.06 (-0.1, -0.01)* | -0.08 (-0.14, -0.03)* | -0.04 (-0.12, 0.04) | -0.12 (-0.2, -0.05)* | 0.001 |
| Model 3† | Reference (0) | -0.05 (-0.1, -0.01)* | -0.08 (-0.13, -0.03)** | -0.03 (-0.12, 0.05) | -0.12 (-0.19, -0.04)* | <0.001 |
| **Total cholesterol, mmol/l** |  |  |  |  |  |  |
| Crude | Reference (0) | 0.01 (-0.02, 0.05) | -0.05 (-0.09, 0.001) | -0.08 (-0.15, -0.01)* | -0.13 (-0.19, -0.08)** | <0.001 |
| Model 1 | Reference (0) | 0.01 (-0.03, 0.04) | -0.04 (-0.08, 0.001) | -0.05 (-0.12, 0.01) | -0.12 (-0.18, -0.07)** | 0.002 |
| Model 2† | Reference (0) | 0.01 (-0.03, 0.05) | -0.04 (-0.09, 0.01) | -0.06 (-0.14, 0.02) | -0.1 (-0.17, -0.03)* | 0.06 |
| Model 3† | Reference (0) | 0.002 (-0.04, 0.05) | -0.04 (-0.09, 0.01) | -0.06 (-0.14, 0.02) | -0.1 (-0.17, -0.02)* | 0.06 |
| **Fasting glucose, mmol/l** |  |  |  |  |  |  |
| Crude | Reference (0) | -0.01 (-0.06, 0.05) | 0.01 (-0.05, 0.07) | 0.06 (-0.04, 0.15) | 0.1 (0.02, 0.18)* | 0.02 |
| Model 1 | Reference (0) | 0.02 (-0.03, 0.06) | 0.03 (-0.02, 0.09) | 0.06 (-0.03, 0.15) | 0.05 (-0.02, 0.12) | 0.27 |
| Model 2† | Reference (0) | 0.001 (-0.06, 0.06) | 0.05 (-0.02, 0.11) | 0.05 (-0.05, 0.16) | 0.08 (-0.02, 0.17) | 0.15 |
| Model 3† | Reference (0) | 0.003 (-0.06, 0.06) | 0.04 (-0.03, 0.1) | 0.04 (-0.06, 0.14) | 0.05 (-0.04, 0.15) | 0.24 |
| **Body mass index, kg/m2** |  |  |  |  |  |  |
| Crude | Reference (0) | -0.01 (-0.11, 0.09) | -0.21 (-0.31, -0.11)*** | -0.24 (-0.43, -0.06)** | -0.32 (-0.46, -0.17)*** | <0.001 |
| Model 1 | Reference (0) | 0.001 (-0.1, 0.1) | -0.18 (-0.27, -0.08)** | -0.09 (-0.28, 0.09) | -0.21 (-0.36, -0.07)** | <0.001 |
| Model 2† | Reference (0) | -0.07 (-0.19, 0.05) | -0.19 (-0.31, -0.07)** | -0.11 (-0.32, 0.1) | -0.28 (-0.47, -0.1)** | 0.005 |
| Model 3† | Reference (0) | 0.06 (-0.06, 0.19) | -0.17 (-0.32, -0.03)** | -0.07 (-0.29, 0.15) | -0.29 (-0.50, -0.09)** | 0.006 |
| **Waist circumference, cm** |  |  |  |  |  |  |
| Crude | Reference (0) | -0.36 (-0.64, -0.08)* | -0.49 (-0.81, -0.16)* | -0.71 (-1.24, -0.18)* | -0.42 (-0.86, 0.01) | 0.06 |
| Model 1 | Reference (0) | -0.13 (-0.29, 0.03) | 0.06 (-0.12, 0.25) | -0.15 (-0.45, 0.15) | 0.25 (0.0001, 0.5)* | 0.08 |
| Model 2† | Reference (0) | -0.175 (-0.36, 0.01) | -0.03 (-0.24, 0.19) | -0.33 (-0.67, 0.001) | 0.24 (-0.07, 0.55) | 0.08 |
| Model 3† | Reference (0) | -0.14 (-0.32, 0.05) | -0.01 (-0.23, 0.2) | -0.31 (-0.64, 0.03) | 0.26 (-0.05, 0.56) | 0.12 |

Model 1: adjusted for sex, age, education, occupation, family income, smoking status, physical activity, alcohol drinking, body mass index (except for BMI above) , self-rated health and chronic disease history (diabetes, hypertension and dyslipidemia), as appropriate.

Model 2 †: Additionally adjusted for daily dietary energy intake

Model 3 †: Additionally adjusted for vegetable, fruit, milk and nut intake

†:18,707participants with data on daily dietary energy intake were included in Model 2&3.

*: P<0.05; **: P<0.01; ***: P<0.001

ESM Table 3. Cross-sectional analysis of the association of egg consumption with cardiovascular risk factors in 12,899 participants with stable egg consumption habit during the 1st follow-up

|  | Egg consumption, number per week | | | | |  |
| --- | --- | --- | --- | --- | --- | --- |
|  | <1  (n=2,208) | 1-2  (n=6,761) | 3-4  (n=3,033) | 5-6  (n=441) | 7+  (n=456) | P for trend |
| **Systolic blood pressure, mmHg** |  |  |  |  |  |  |
| Crude | Reference (0) | 2.05 (1.02, 3.07)** | -0.96 (-1.88, -0.05)* | -2.68 (-4.74, -0.63)* | -1.88 (-3.89, 0.14) | <0.001 |
| Model 1† | Reference (0) | 0.77 (-0.18, 1.72) | -0.78 (-1.62, 0.06) | -1.9 (-3.79, -0.01)* | -2.25 (-4.09, -0.4)* | <0.001 |
| **Diastolic blood pressure, mmHg** |  |  |  |  |  |  |
| Crude | Reference (0) | 0.65 (0.12, 1.18)* | -0.31 (-0.78, 0.16) | -1.28 (-2.35, -0.22)* | -1.32 (-2.36, -0.28)* | <0.001 |
| Model 1† | Reference (0) | 0.54 (0.03, 1.05)* | -0.16 (-0.61, 0.3) | -0.80 (-1.82, 0.22) | -0.86 (-1.85, 0.14) | 0.001 |
| **LDL-cholesterol, mmol/l** |  |  |  |  |  |  |
| Crude | Reference (0) | -0.02 (-0.06, 0.01) | -0.02 (-0.05, 0.01) | -0.08 (-0.14, -0.01)* | -0.09 (-0.15, -0.02)* | <0.001 |
| Model 1† | Reference (0) | -0.01 (-0.04, 0.03) | -0.03 (-0.06, 0.001) | -0.07 (-0.13, 0.001) | -0.07 (-0.13, -0.002)* | 0.008 |
| **HDL-cholesterol, mmol/l** |  |  |  |  |  |  |
| Crude | Reference (0) | -0.004 (-0.02, 0.02) | 0.01 (-0.01, 0.03) | 0.01 (-0.03, 0.05) | 0 (-0.04, 0.03) | 0.48 |
| Model 1† | Reference (0) | -0.002 (-0.02, 0.02) | 0.01 (-0.01, 0.02) | -0.01 (-0.04, 0.03) | -0.01 (-0.04, 0.03) | 0.87 |
| **Triglycerides, mmol/l** |  |  |  |  |  |  |
| Crude | Reference (0) | 0.07 (0.01, 0.13)* | -0.06 (-0.11, -0.004)* | -0.08 (-0.19, 0.04) | -0.10 (-0.22, 0.01) | <0.001 |
| Model 1† | Reference (0) | 0.06 (0.0009, 0.12)* | -0.05 (-0.1, 0.003) | -0.02 (-0.14, 0.10) | -0.09 (-0.21, 0.02) | 0.001 |
| **Total cholesterol, mmol/l** |  |  |  |  |  |  |
| Crude | Reference (0) | -0.02 (-0.08, 0.03) | -0.02 (-0.07, 0.02) | -0.05 (-0.16, 0.06) | -0.11 (-0.22, -0.002)* | 0.15 |
| Model 1† | Reference (0) | -0.01 (-0.07, 0.04) | -0.03 (-0.08, 0.02) | -0.03 (-0.14, 0.08) | -0.1 (-0.21, 0.005) | 0.10 |
| **Fasting glucose, mmol/l** |  |  |  |  |  |  |
| Crude | Reference (0) | 0.01 (-0.06, 0.09) | 0.01 (-0.05, 0.08) | 0.02 (-0.13, 0.16) | 0.16 (0.01, 0.30)* | 0.20 |
| Model 1† | Reference (0) | -0.02 (-0.08, 0.05) | 0 (-0.05, 0.06) | 0.03 (-0.1, 0.16) | 0.04 (-0.09, 0.17) | 0.36 |
| **Body mass index, kg/m2** |  |  |  |  |  |  |
| Crude | Reference (0) | 0.1 (-0.06, 0.25) | -0.25 (-0.39, -0.11)*** | -0.17 (-0.48, 0.14) | -0.11 (-0.41, 0.2) | 0.001 |
| Model 1† | Reference (0) | 0.06 (-0.1, 0.21) | -0.2 (-0.33, -0.06)** | -0.02 (-0.32, 0.29) | 0.04 (-0.26, 0.34) | 0.08 |
| **Waist circumference, cm** |  |  |  |  |  |  |
| Crude | Reference (0) | 0.67 (0.25, 1.1) | -0.32 (-0.7, 0.05) | -0.47 (-1.32, 0.37) | 0.16 (-0.67, 0.99) | 0.002 |
| Model 1† | Reference (0) | 0.25 (-0.16, 0.66) | -0.28 (-0.64, 0.08) | -0.16 (-0.97, 0.65) | 0.18 (-0.61, 0.97) | 0.16 |

†: adjusted for sex, age, education, occupation, family income, smoking status, physical activity, alcohol drinking, self-rated health and chronic disease history (diabetes, hypertension and dyslipidemia).

ESM Table 4. Adjusted hazards ratios (HR) and 95% confidence interval (CI) of all-cause mortality for baseline egg consumption in 27,963 participants (61 participants consuming more than 1 egg/day were excluded)

|  | Egg consumption, number per week | | | | |
| --- | --- | --- | --- | --- | --- |
|  | <1 | 1-2 | 3-4 | 5-6 | 7 |
| **Person-years** | 57402 | 120820 | 60979 | 13800 | 21770 |
| **All-cause** |  |  |  |  |  |
| No. of deaths | 614 | 1120 | 580 | 127 | 234 |
| Mortality rate, per 10,000 person-year | 107 | 92.7 | 95.1 | 92 | 107.5 |
| Adjusted HR (95% CI)† | 1.00 | 1.00 (0.91, 1.11) | 0.99 (0.88, 1.12) | 0.89 (0.73, 1.08) | 1.07 (0.91, 1.25) |
| **Cardiovascular disease** |  |  |  |  |  |
| No. of deaths | 201 | 371 | 185 | 40 | 73 |
| Mortality rate, per 10,000 person-year | 35 | 30.7 | 30.3 | 29 | 33.5 |
| Adjusted HR (95% CI)† | 1.00 | 1.09 (0.91, 1.3) | 1.04 (0.85, 1.28) | 0.88 (0.62, 1.26) | 1.06 (0.8, 1.4) |
| **Ischemic heart disease** |  |  |  |  |  |
| No. of deaths | 83 | 166 | 90 | 16 | 32 |
| Mortality rate, per 10,000 person-year | 14.5 | 13.7 | 14.8 | 11.6 | 14.7 |
| Adjusted HR (95% CI)† | 1.00 | 1.16 (0.89, 1.53) | 1.20 (0.88, 1.63) | 0.87 (0.5, 1.51) | 1.07 (0.7, 1.65) |
| **All Stroke** |  |  |  |  |  |
| No. of deaths | 84 | 146 | 69 | 16 | 24 |
| Mortality rate, per 10,000 person-year | 14.6 | 12.1 | 11.3 | 11.6 | 11 |
| Adjusted HR (95% CI)† | 1.00 | 1.01 (0.77, 1.33) | 0.91 (0.66, 1.27) | 0.82 (0.47, 1.43) | 0.85 (0.53, 1.35) |

†: adjusted for sex, age, education, occupation, family income, smoking status, physical activity, alcohol drinking, self-rated health and chronic disease history (diabetes, hypertension and dyslipidemia).

ESM Table 5. Adjusted hazards ratios (HR) and 95% confidence interval (CI) of all-cause mortality for baseline egg consumption by education‡ in 28,024 participants

|  | Egg consumption, number per week | | | | |
| --- | --- | --- | --- | --- | --- |
|  | <1 | 1-2 | 3-4 | 5-6 | 7+ |
| **Low education (Illiterate or primary school)** | | | | |  |
| **Person-years** | 31,294 | 51,451 | 24,172 | 5,258 | 6,588 |
| **All-cause** |  |  |  |  |  |
| No. of deaths | 410 | 613 | 286 | 63 | 76 |
| Mortality rate, per 10,000 person-year | 131 | 119 | 118 | 120 | 115 |
| Adjusted HR (95% CI) | 1.00 | 1.00 (0.88, 1.14) | 0.97 (0.83, 1.13) | 0.9 (0.69, 1.19) | 0.94 (0.73, 1.2) |
| **Cardiovascular disease** |  |  |  |  |  |
| No. of deaths | 150 | 225 | 98 | 21 | 25 |
| Mortality rate, per 10,000 person-year | 48 | 44 | 41 | 40 | 38 |
| Adjusted HR (95% CI) | 1.00 | 1.06 (0.85, 1.31) | 0.95 (0.73, 1.24) | 0.85 (0.53, 1.36) | 0.82 (0.52, 1.27) |
| **Ischemic heart disease** |  |  |  |  |  |
| No. of deaths | 60 | 95 | 47 | 8 | 14 |
| Mortality rate, per 10,000 person-year | 19 | 18 | 19 | 15 | 21 |
| Adjusted HR (95% CI) | 1.00 | 1.1 (0.79, 1.53) | 1.11 (0.75, 1.65) | 0.75 (0.34, 1.65) | 1.11 (0.61, 2.04) |
| **All Stroke** |  |  |  |  |  |
| No. of deaths | 61 | 93 | 36 | 11 | 10 |
| Mortality rate, per 10,000 person-year | 19 | 18 | 15 | 21 | 15 |
| Adjusted HR (95% CI) | 1.00 | 1.05 (0.75, 1.46) | 0.84 (0.55, 1.28) | 1.1 (0.57, 2.09) | 0.77 (0.38, 1.56) |
| **Relatively high education (secondary school, and college or above)** | | | | |  |
| **Person-years** | 135,877 | 142,459 | 139,507 | 134,424 | 136,831 |
| **All-cause** |  |  |  |  |  |
| No. of deaths | 1,040 | 1,098 | 1,089 | 1,021 | 1,054 |
| Mortality rate, per 10,000 person-year | 77 | 77 | 78 | 76 | 77 |
| Adjusted HR (95% CI) | 1.00 | 1.01 (0.86, 1.19) | 1.03 (0.86, 1.23) | 0.88 (0.66, 1.17) | 1.2 (0.98, 1.47) |
| **Cardiovascular disease** |  |  |  |  |  |
| No. of deaths | 300 | 318 | 313 | 294 | 304 |
| Mortality rate, per 10,000 person-year | 22 | 22 | 22 | 22 | 22 |
| Adjusted HR (95% CI) | 1.00 | 1.13 (0.83, 1.54) | 1.15 (0.82, 1.62) | 1.03 (0.61, 1.74) | 1.41 (0.96, 2.06) |
| **Ischemic heart disease** |  |  |  |  |  |
| No. of deaths | 141 | 153 | 150 | 139 | 142 |
| Mortality rate, per 10,000 person-year | 10 | 11 | 11 | 10 | 10 |
| Adjusted HR (95% CI) | 1.00 | 1.31 (0.82, 2.09) | 1.36 (0.82, 2.26) | 1.16 (0.54, 2.51) | 1.33 (0.74, 2.4) |
| **All Stroke** |  |  |  |  |  |
| No. of deaths | 109 | 114 | 114 | 105 | 111 |
| Mortality rate, per 10,000 person-year | 8 | 8 | 8 | 8 | 8 |
| Adjusted HR (95% CI) | 1.00 | 0.92 (0.57, 1.49) | 0.96 (0.56, 1.62) | 0.56 (0.21, 1.48) | 0.97 (0.52, 1.82) |

†: adjusted for sex, age, occupation, family income, smoking status, physical activity, alcohol drinking, self-rated health and chronic disease history (diabetes, hypertension and dyslipidemia).

‡: P for interaction between egg consumption and education ranged 0.65 to 0.97

ESM Table 6 Details of studies in the meta-analysis

| **Study** | **First author (year)** | **Setting** | **Total sample** | **Events(number)** | **Age range of participants** | **Main findings HR (95% CI)** |
| --- | --- | --- | --- | --- | --- | --- |
| 1 | Hu 1999[1] | USA | 37,851 men and 80,082  women | CHD (866 in men and 939 in women)  Stroke (258 in men and 563 in women) | Men: 40-75  Women: 34-59 | ***IHD:***  Men HR=1.08 (0.79-1.48)  Women HR=0.82 (0.60-1.13)  ***All stroke:***  Men HR=1.07 (0.66-1.75)  Women HR=0.89 (0.60-1.31)  ***Ischemic stroke:***  Men HR=0.93 (0.46-1.87)  Women HR=0.81 (0.46-1.42)  ***Haemorrhagic stroke:***  Men HR=1.07 (0.66-1.75)  Women HR=1.07 (0.56-2.03) |
| 2 | He 2003[2] | USA | 43,732 men | 455 ischemic strokes; 125  haemorrhagic stokes | 40-75 | ***Ischemic stroke:***  HR=1.09 (0.69-1.71)  ***Haemorrhagic stroke:***  HR=0.32 (0.07-1.37) |
| 3 | Sauvaget 2003[3] | Japan | 37,130 | Stroke (1462) | 34-103 | HR=0.70 (0.51-0.95) |
| 4 | Nakamura 2004[4] | Japan | 5,186 women and 4,077 men | IHD (39 in men and 41 in women)  Stroke (112 in men and 107 in women) | 30+ | ***IHD:***  Men HR=0.93 (0.50-1.87)  Women HR=0.86 (0.62-1.40)  ***All stroke:***  Men HR=1.03 (0.67-1.53)  Women HR=1.11 (0.74-1.48)  ***All cause***  Men HR=1.15 (0.88-1.28)  Women HR=1.01 (0.88-1.15) |
| 5 | Nakamura 2006[5] | Japan | 90,735 | IHD (462) | 40-69 | HR=0.93 (0.84-1.11) |
| 6 | Qureshi 2007[6] | USA | 9,734 | IHD (1584)  Stroke (655) | 25-74 | ***IHD:***  HR=1.1 (0.90-1.30)  ***All stroke:***  HR=0.9 (0.70-1.10)  ***All cause***  HR=1.0 (0.90-1.10) |
| 7 | Djousse 2008[7] | USA | 21,327 men | MI (1550)  Stroke (1342) | 40-85 | ***MI:***  HR=0.90 (0.72-1.14)  ***All stroke:***  HR=0.99 (0.80-1.20)  ***All cause***  HR=1.23 (1.11-1.36) |
| 8 | Scrafford 2011[8] | USA | 6,833 men and 8,113 women | IHD (366)  Stroke (137) | 17+ | ***IHD:***  Men HR=1.13 (0.61-2.11)  Women HR=0.92 (0.27-3.11)  ***All stroke:***  Men HR=0.27 (0.10-0.73)  Women HR=1.03 (0.25-4.22) |
| 9 | Bernstein 2012[9] | USA | 84,010 women and 43,150 men | Stroke (2633 in women and 1397 in men) | Men: 40-75 years  Women: 30-55 | ***All stroke:***  Men HR=0.84 (0.68-1.04)  Women HR=0.91 (0.80-1.04)  ***Ischemic stroke:***  Men HR=0.79 (0.61-1.04)  Women HR=0.95 (0.79-1.14)  ***Haemorrhagic stroke:***  Men HR=0.53 (0.22-1.25)  Women HR=0.76 (0.47-1.23) |
| 10 | Larsson 2015[10] | Sweden | 37,766 men  and 32,805 women | MI (3,262 in men &1,504 in women); ischemic strokes (2,039 in men and 1,561 in women);  haemorrhagic strokes (405 in men  and 294 in women) | men 45-79y and women 49-83 y | ***MI:***  Men HR=1.03 (0.84-1.27)  Women HR=0.85 (0.59-1.23)  ***Ischemic stroke:***  Men HR=0.87 (0.66-1.14)  Women HR=1.06 (0.76-1.47)  ***Haemorrhagic stroke:***  Men HR=1.05 (0.59-1.88)  Women HR=0.96 (0.44-2.12) |
| 11 | Virtanen 2016[11] | Finland | 1,032 men | 230 IHD | 42-60 | HR=1.18 (0.85-1.66) |

HR=hazard ratio; CI=confidence interval; USA=United States of America; IHD=ischemic stroke; MI=myocardial infarction

ESM Figure 1. Study sample selection.

**
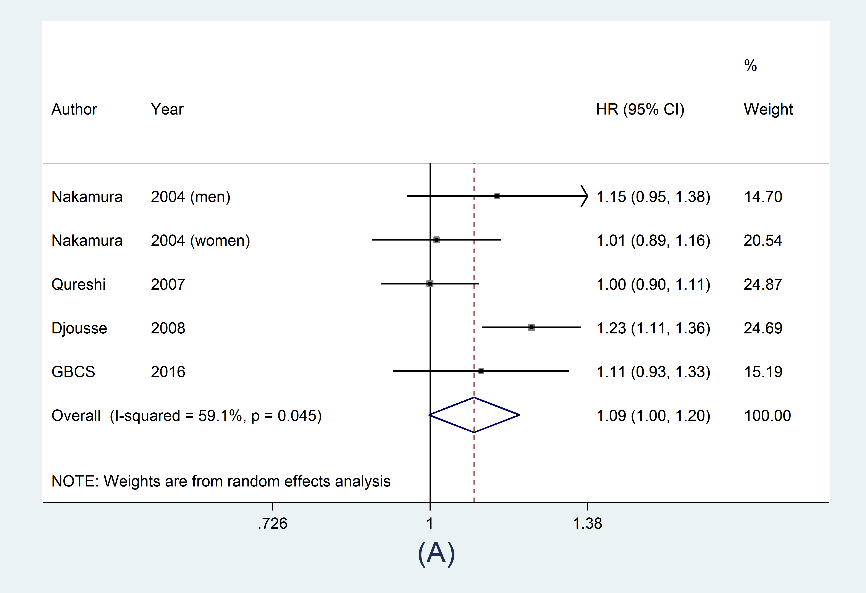
**

**
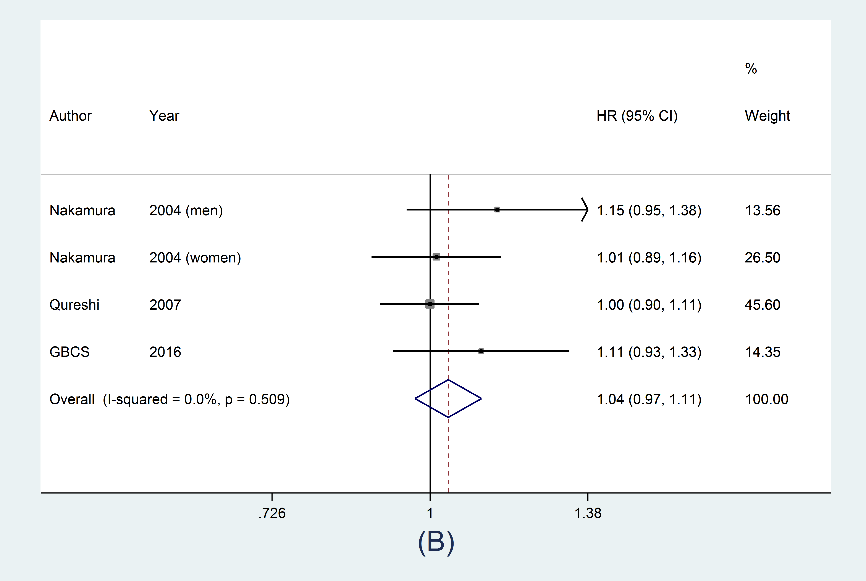
**

ESM Figure 2. Pooled HRs and 95% CIs of all-cause mortality including results from the Guangzhou Biobank Cohort Study (GBCS). The pooled estimates were obtained by using a random effect model for model (A), and fixed effect model for model (B). The study by *Djousse et al. 2008[7]* which contributed most to heterogeneity were excluded in model (B). The dots indicate the adjusted HRs from a comparison of the highest category of egg consumption (≥7 eggs/week) with the lowest (<1 egg/week or never). The size of the square is proportional to the weight of individual study. The horizontal lines represent 95% CI. The diamond data markers indicate the pooled HR.


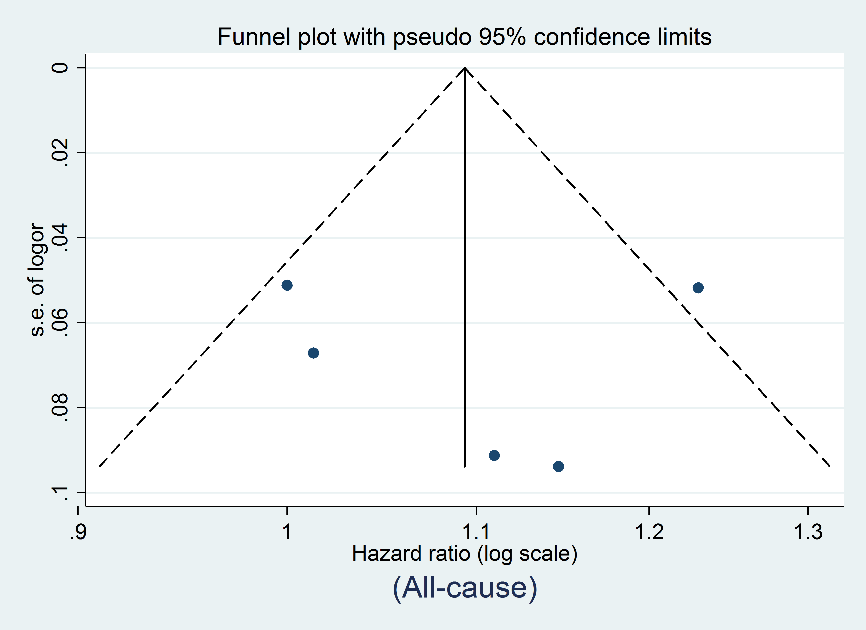


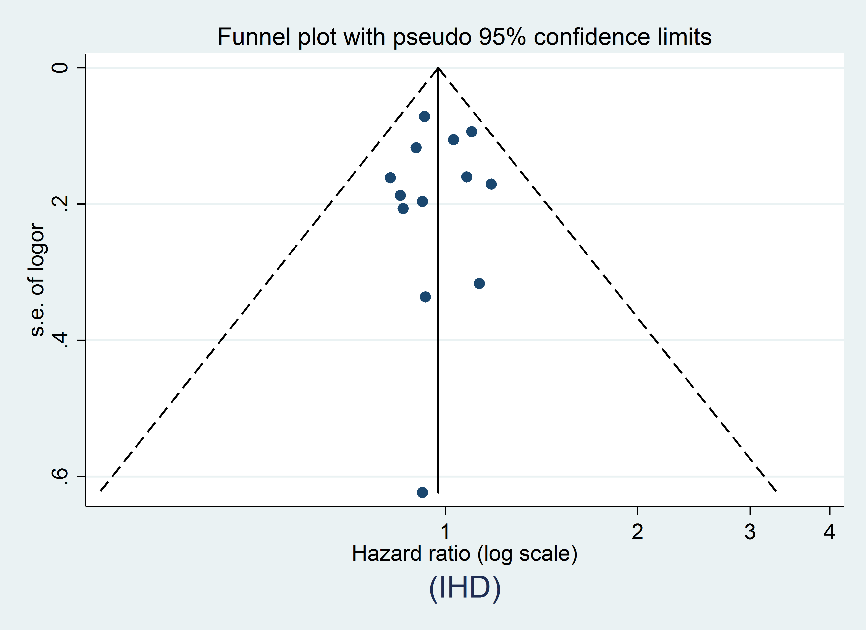


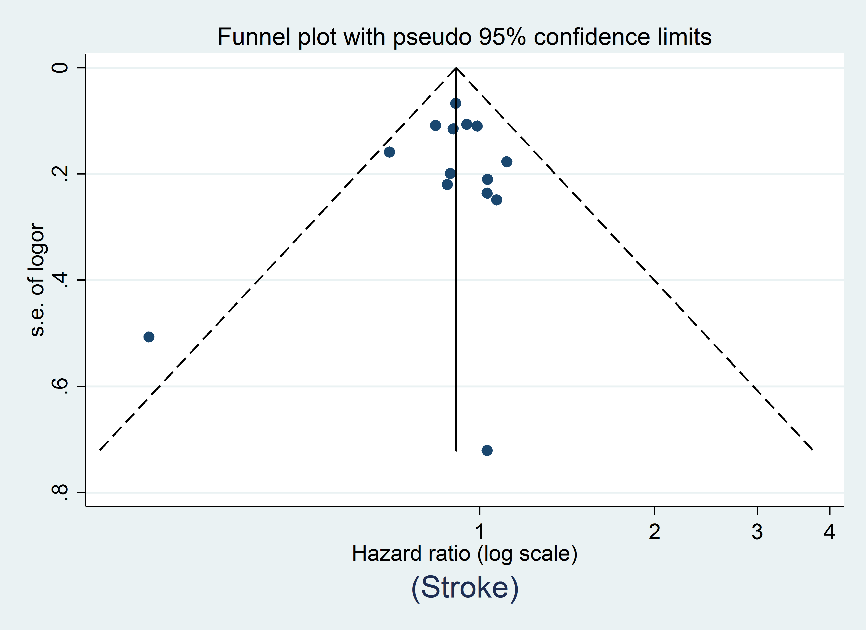


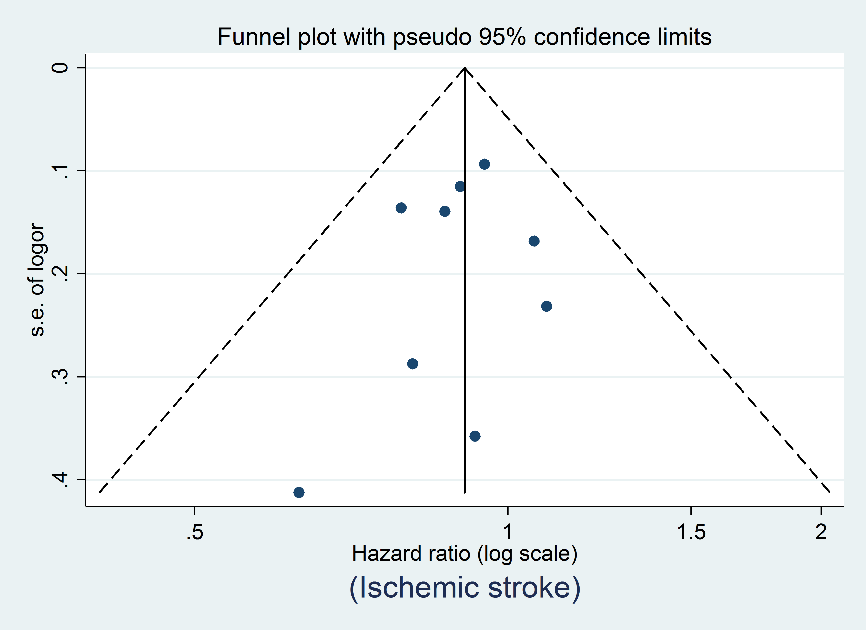

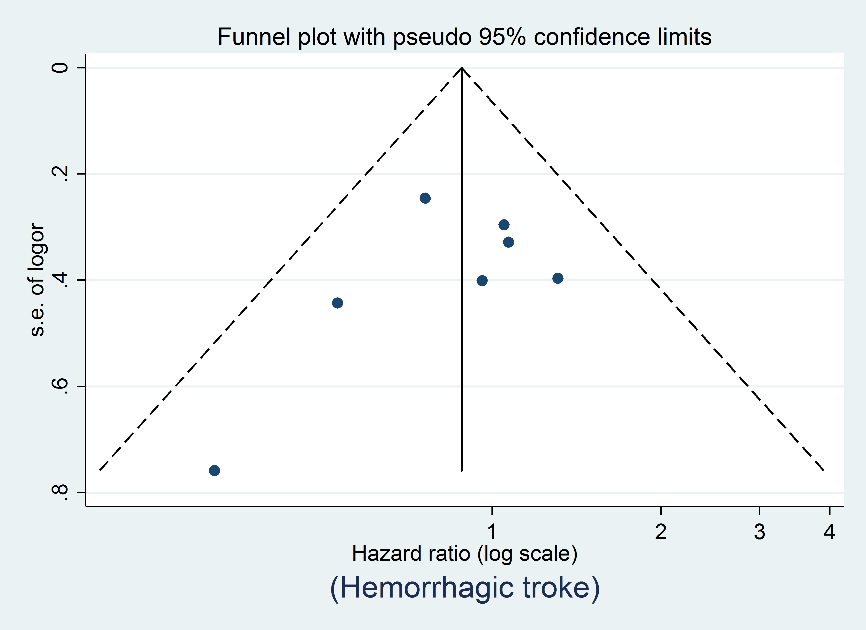


**ESM Figure 3:** Test for publication bias for the association between egg intake and all-cause mortality, ischemic heart disease, and stroke and its subtypes

Note: Tests for publication bias: (1) Begg’s test, P=0.33, 0.90, 0.87, 0.53 and 0.18 for all-cause mortality, IHD, stroke, ischemic stroke and hemorrhagic stroke, respectively; (2) Egger’s test, P=0.74, 0.86, 0.57, 0.61, 0.36 for all-cause mortality, IHD, stroke, ischemic stroke and hemorrhagic stroke, respectively.

**References**

1. Hu FB, Stampfer MJ, Rimm EB, Manson JE, Ascherio A, Colditz GA, Rosner BA, Spiegelman D, Speizer FE, Sacks FM, Hennekens CH, Willett WC (1999) A prospective study of egg consumption and risk of cardiovascular disease in men and women. JAMA 281 (15):1387-1394

2. He K, Merchant A, Rimm EB, Rosner BA, Stampfer MJ, Willett WC, Ascherio A (2003) Dietary fat intake and risk of stroke in male US healthcare professionals: 14 year prospective cohort study. BMJ 327 (7418):777-782. doi:10.1136/bmj.327.7418.777

3. Sauvaget C, Nagano J, Allen N, Grant EJ, Beral V (2003) Intake of animal products and stroke mortality in the Hiroshima/Nagasaki Life Span Study. International Journal of Epidemiology 32 (4):536-543

4. Nakamura Y, Okamura T, Tamaki S, Kadowaki T, Hayakawa T, Kita Y, Okayama A, Ueshima H, Group NDR (2004) Egg consumption, serum cholesterol, and cause-specific and all-cause mortality: the National Integrated Project for Prospective Observation of Non-communicable Disease and Its Trends in the Aged, 1980 (NIPPON DATA80). Am J Clin Nutr 80 (1):58-63

5. Nakamura Y, Iso H, Kita Y, Ueshima H, Okada K, Konishi M, Inoue M, Tsugane S (2006) Egg consumption, serum total cholesterol concentrations and coronary heart disease incidence: Japan Public Health Center-based prospective study. Br J Nutr 96 (5):921-928

6. Qureshi AI, Suri FK, Ahmed S, Nasar A, Divani AA, Kirmani JF (2007) Regular egg consumption does not increase the risk of stroke and cardiovascular diseases. Med Sci Monit 13 (1):CR1-8

7. Djousse L, Gaziano JM (2008) Egg consumption in relation to cardiovascular disease and mortality: the Physicians' Health Study. Am J Clin Nutr 87 (4):964-969

8. Scrafford CG, Tran NL, Barraj LM, Mink PJ (2011) Egg consumption and CHD and stroke mortality: a prospective study of US adults. Public Health Nutr 14 (2):261-270. doi:10.1017/S1368980010001874

9. Bernstein AM, Pan A, Rexrode KM, Stampfer M, Hu FB, Mozaffarian D, Willett WC (2012) Dietary protein sources and the risk of stroke in men and women. Stroke 43 (3):637-644. doi:10.1161/STROKEAHA.111.633404

10. Larsson SC, Akesson A, Wolk A (2015) Egg consumption and risk of heart failure, myocardial infarction, and stroke: results from 2 prospective cohorts. Am J Clin Nutr 102 (5):1007-1013. doi:10.3945/ajcn.115.119263

11. Virtanen JK, Mursu J, Virtanen HE, Fogelholm M, Salonen JT, Koskinen TT, Voutilainen S, Tuomainen TP (2016) Associations of egg and cholesterol intakes with carotid intima-media thickness and risk of incident coronary artery disease according to apolipoprotein E phenotype in men: the Kuopio Ischaemic Heart Disease Risk Factor Study. Am J Clin Nutr 103 (3):895-901. doi:10.3945/ajcn.115.122317
